# Supplementary material for: Effect of the Carbon Source and Plant Growth Regulators (PGRs) in the Induction and Maintenance of an In Vitro Callus Culture of Taraxacum officinale (L) Weber Ex F.H. Wigg
Source: MDPI journal article supplement (doi:10.3390/agronomy11061181), 2021-06-10
Supplement: s1 [file s1]

**Table S1.** Plant growth regulator (PGR) treatments (BAP and NAA in combination) for callus induction in Experiment 3. CS: Carbon source.

| Experiment 3                   |                       |
|--------------------------------|-----------------------|
| Previously selected conditions | BAP-NAA (mg/L - mg/L) |
|                                | 3.0- 0.05             |
| (Experiment 1)                 | 1.25-0.05             |
| Explant – Light                | 0.5-0.05              |
|                                | 3.0-0.225             |
| +                              | 1.25-0.225            |
| x                              | 0.5-0.225             |
| (Experiment 2)                 | 3.0-0.5               |
| CS type - CS                   | 1.25-0.5              |
| concentration                  | 0.5-0.5               |
|                                | 0-0                   |

**Table S2.** Plant growth regulator (PGR) treatments (BAP and NAA in combination) for callus maintenance.

| Treatment | BAP – NAA (mg/L – mg/L) |
|-----------|-------------------------|
| 1         | 0-0                     |
| 2         | 0.05-0.05               |
| 3         | 0.1-0.1                 |
| 4         | 0.23-0.23               |
| 5         | 0.5-0.5                 |
| 6         | 1.0-1.0                 |
| 7         | 2.0-2.0                 |
| 8         | 3.0-3.0                 |
| 9         | 5.0-5.0                 |
| 10        | 7.0-7.0                 |
| 11        | 10.0-10.0               |

**Table S3.** Parameters evaluated on callus induction and maintenance from *T. officinale* explants.

| Parameter                                                              | Description                                                                                                                                 | Classification on scale                                                                          |
|------------------------------------------------------------------------|---------------------------------------------------------------------------------------------------------------------------------------------|--------------------------------------------------------------------------------------------------|
| <b>Callus induction</b>                                                |                                                                                                                                             |                                                                                                  |
| Callogenesis (%)                                                       | The percentage of explants with callus regarding the total explants sowed.                                                                  | ---                                                                                              |
| Degree of callus formation (% scale)                                   | Callus formation regarding surface of the explant. Measured using a millimetric grid.                                                       | -: No calli,<br>+: Minor calli <33%,<br>++: Moderate calli 34-66%,<br>+++: Profuse calli 67-100% |
| Induction time (d)                                                     | The time when callus induction was initiated.                                                                                               | ---                                                                                              |
| Color                                                                  | Main coloration of the callus masses (Y) Yellow, (PY) Pale yellow. (DY) Dark yellow. (PG) Pale green. (G) Green, (DG) Dark green, (B) Brown | ---                                                                                              |
| Friability (% scale)                                                   | The percentage of the friable cell mass considering the total callus mass in weight. Determined by mechanical disruption.                   | -: null 0% (compact 100%)<br>+: low <33%,<br>++: medium 34-66%,<br>+++: high 67-100%             |
| Organogenesis (%)                                                      | The percentage of callus that develops shoots or roots with respect to the total number of calli.                                           | ---                                                                                              |
| Viability (%)                                                          | The percentage of the explants that <del>died</del> survived without contamination during the experimental period.                          | ---                                                                                              |
| Final callus weight (fresh and dry weight, FW and DW respectively) (g) | Cell mass before (FW) and after (DW) dryness.                                                                                               | ---                                                                                              |
| Humidity                                                               | Considered as the cell weight loss after dryness at 105°C overnight.                                                                        | ---                                                                                              |
| Growth index (GI)*                                                     | The ratio between the fresh weight at time <i>t</i> , and the initial fresh weight of the inoculum.                                         | ---                                                                                              |
| Organogenic ratio*                                                     | The proportion of the callus that develops shoots or roots with respect to the total mass of the callus.                                    | +: low <33%,<br>++: medium 34-66%,<br>+++: high 67-100%                                          |

\* Only during callus maintenance.

**Table S4.** Statistical results (Wilks' Lambda Test) on callus induction from different *T. officinale* explants under the conditions proposed in this work. CS: Carbon source. DF - Degrees of Freedom.

| <b>Experiment 1</b>                   | <b>Value</b> | <b>F</b> | <b>Hypothesis<br/>DF</b> | <b>Error DF</b> | <b>Sig.</b> | <b>Partial Eta<br/>Squared</b> |
|---------------------------------------|--------------|----------|--------------------------|-----------------|-------------|--------------------------------|
| <b>Intercept</b>                      | 0.000        | 1.7 E34  | 6.000                    | 195.0           | 0.000       | 1.000                          |
| <b>Explant</b>                        | 0.610        | 18.716   | 14.000                   | 86.000          | 0.000       | 0.753                          |
| <b>Light</b>                          | 0.163        | 31.504   | 7.000                    | 43.000          | 0.000       | 0.837                          |
| <b>Explant × Light</b>                | 0.272        | 16.461   | 7.000                    | 43.000          | 0.000       | 0.728                          |
| <b>Experiment 2</b>                   |              |          |                          |                 |             |                                |
| <b>CS type</b>                        | 0.058        | 132.2    | 8.000                    | 65.0            | 0.000       | 0.942                          |
| <b>CS<br/>concentration</b>           | 0.000        | 176.6    | 24.000                   | 189.1           | 0.000       | 0.953                          |
| <b>CS type × CS<br/>concentration</b> | 0.060        | 12.9     | 24.000                   | 189.1           | 0.000       | 0.608                          |
| <b>Experiment 3</b>                   |              |          |                          |                 |             |                                |
| <b>PGR</b>                            | 0.000        | 47.0     | 63.000                   | 535.5           | 0.000       | 0.779                          |

**Table S5.** Statistical results (p-value) for explant type, light, carbon source type and concentration, and PGR concentration on callus induction from *T. officinale* explants.

| Dependent variable                | Experiment 1 |           |       | Experiment 2 |          | Experiment 3       |       |
|-----------------------------------|--------------|-----------|-------|--------------|----------|--------------------|-------|
|                                   | Explant      | Explant × |       | CS type      | CS conc. | CS conc. × CS type | PGR   |
|                                   |              | Light     | Light |              |          |                    |       |
| <b>Callogenesis</b>               | 0.000        | 0.282     | 0.282 | 0.000        | 0.000    | 0.000              | 0.000 |
| <b>Induction time</b>             | 0.000        | 0.000     | 0.002 | 0.540        | 0.992    | 0.814              | 0.000 |
| <b>Degree of callus formation</b> | 0.000        | 0.000     | 0.000 | NM*          | NM*      | NM*                | NM*   |
| <b>Fresh callus weight</b>        | 0.000        | 0.282     | 0.282 | 0.000        | 0.000    | 0.000              | 0.000 |
| <b>Dry callus weight</b>          | 0.000        | 0.282     | 0.282 | 0.442        | 0.000    | 0.017              | 0.000 |
| <b>Organogenesis</b>              | 0.000        | 0.000     | 0.000 | 0.000        | 0.000    | 0.000              | 0.000 |
| <b>Viability</b>                  | 0.000        | 0.000     | 0.000 | 0.000        | 0.000    | 0.000              | 0.000 |
| <b>Color</b>                      | 0.000        | 0.000     | 0.000 | 0.000        | 0.000    | 0.000              | 0.000 |
| <b>Friability</b>                 | 0.000        | 0.000     | 0.000 | 0.000        | 0.000    | 0.241              | 0.000 |
| <b>Humidity</b>                   | 0.000        | 0.000     | 0.000 | 0.000        | 0.000    | 0.000              | 0.000 |

NM: Not measured. \*Not measured for hypocotyls, this parameter was not applied because callus grew strictly from only one side of the explant covering it completely.
